# Supplementary figures and images for: PRMT1-mediated metabolic reprogramming promotes leukemogenesis
Source: eLife journal article supplement (doi:10.7554/elife.105318), 2025-02-17

None

WT

WT+v1

WT+v2

Mut

Mut+v1

Mut+v2

RBM15

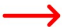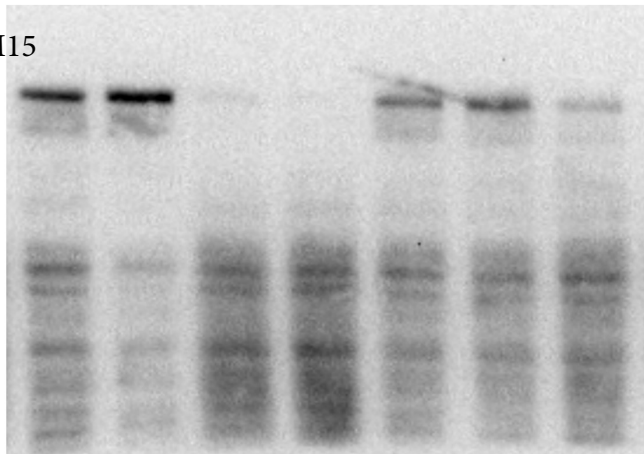

Supplement: fig2-figsupp1-data1 [file elife-105318-fig2-figsupp1-data1-v1.zip]

None WT WT+v1 WT+v2 Mut Mut+v1 Mut+v2

PRMT1

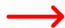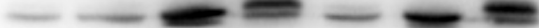

Supplement: fig2-figsupp1-data1 [file elife-105318-fig2-figsupp1-data1-v1.zip]

None WT WT+v1 WT+v2 Mut Mut+v1 Mut+v2

GAPDH

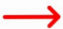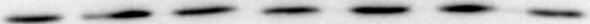

Supplement: fig2-figsupp1-data1 [file elife-105318-fig2-figsupp1-data1-v1.zip]

→  
HA

None

WT

WT+v1

WT+v2

Mut

Mut+v1

Mut+v2

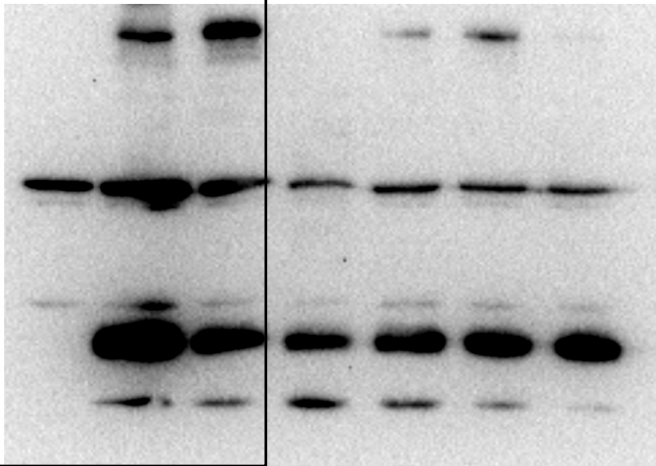

Supplement: fig2-figsupp1-data1 [file elife-105318-fig2-figsupp1-data1-v1.zip]

prmt1

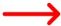

None

WT

WT+MS

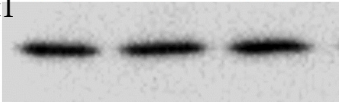

Supplement: fig2-figsupp1-data3 [file elife-105318-fig2-figsupp1-data3-v1.zip]

None

WT

WT+MS

GPADH

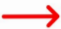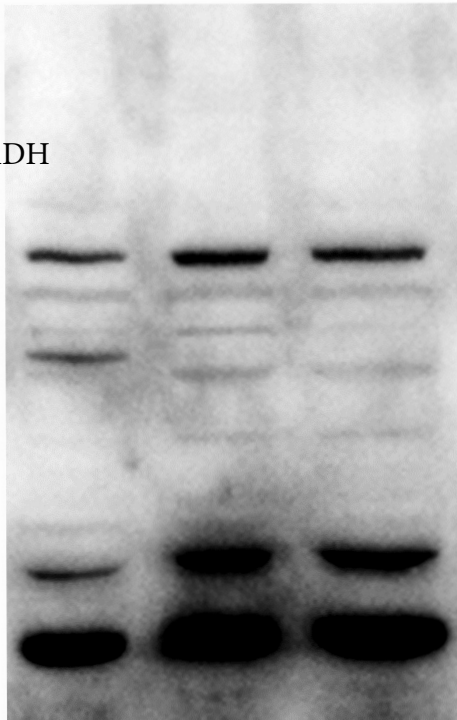

Supplement: fig2-figsupp1-data3 [file elife-105318-fig2-figsupp1-data3-v1.zip]

None

WT

WT+MS

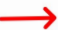

RBM15

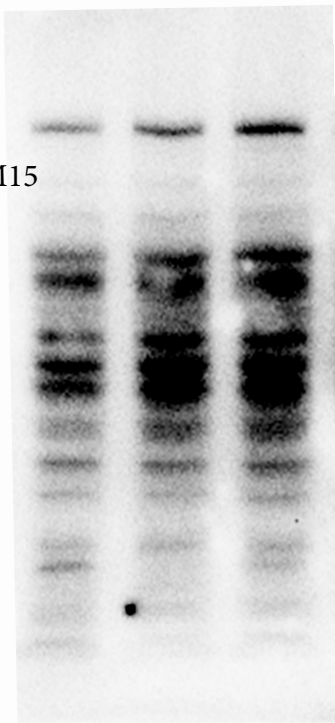

Supplement: fig2-figsupp1-data3 [file elife-105318-fig2-figsupp1-data3-v1.zip]

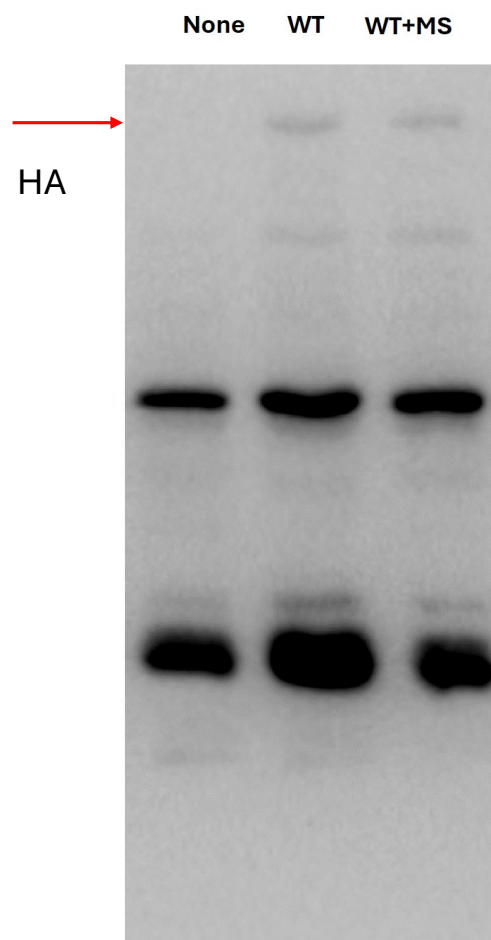

Supplement: fig2-figsupp1-data3 [file elife-105318-fig2-figsupp1-data3-v1.zip]

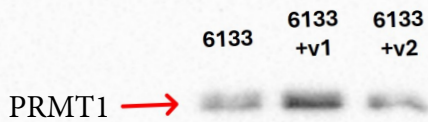

Supplement: fig3-data1 [file elife-105318-fig3-data1-v1.zip]

Py10-LDHA →

| 6133                                                                              | 6133<br>+v1                                                                       | 6133<br>+v2                                                                         |
|-----------------------------------------------------------------------------------|-----------------------------------------------------------------------------------|-------------------------------------------------------------------------------------|
|  |  |  |

6133

6133  
+v1

6133  
+v2

Supplement: fig3-data1 [file elife-105318-fig3-data1-v1.zip]

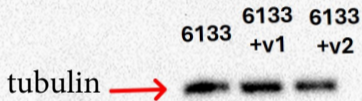

Supplement: fig3-data1 [file elife-105318-fig3-data1-v1.zip]

6133      6133      6133  
         +v1      +v2

→  
LDHA

6133

6133  
+v1

6133  
+v2

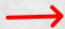

LDHA

Supplement: fig3-data1 [file elife-105318-fig3-data1-v1.zip]
